# Supplementary material for: Multifunctional reduced graphene oxide coated cloths for oil/water separation and antibacterial application
Source: Royal Society of Chemistry journal article supplement (doi:10.1039/c6ra08079k), 2016-01-01
Supplement: c6ra08079k1.pdf [file c6ra08079k1.pdf]

## **Supplementary Information**

### **Multifunctional reduced graphene oxide coated clothes for oil/water separation and antibacterial application**

Ravi Kant Upadhyay<sup>a</sup>, Amrita Dubey<sup>b</sup>, Prashant R. Waghmare<sup>c</sup>, Richa Priyadarshini<sup>b</sup>, and Susanta Sinha Roy<sup>d\*</sup>

---

<sup>a</sup>. *Department of Chemistry, School of Natural Sciences, Shiv Nadar University, Gautam Budh Nagar 201314, Uttar Pradesh, India.*

<sup>b</sup>. *Department of Life Sciences, School of Natural Sciences, Shiv Nadar University, Gautam Budh Nagar 201314, Uttar Pradesh, India.*

<sup>c</sup>. *Department of Mechanical Engineering, University of Alberta, Edmonton, Canada T6 G 2G8*

<sup>d</sup>. *\*Department of Physics, School of Natural Sciences, Shiv Nadar University, Gautam Budh Nagar 201314, Uttar Pradesh, India.*

#### **Physical parameters of clothes**

##### Weight of clothes:

Weight of 2x2 cm sparse cloth piece = 61.5 mg

Weight of 2x2 cm dense cloth piece = 14.2 mg

##### Water absorption capacity:

Pristine dense cloth: 11.063 g/g

Pristine sparse cloth: 1.8975 g/g

##### Diameter of fibers:

Pristine dense cloth: ~12  $\mu\text{m}$

Pristine sparse cloth: ~18.5  $\mu\text{m}$

##### Percentage increase in weight after 20 times deposition of GO:

Dense cloth: 20%

Sparse cloth: 4.33%

## XPS analysis of pristine dense cloth (cloth-A) and sparse cloth (cloth-B)

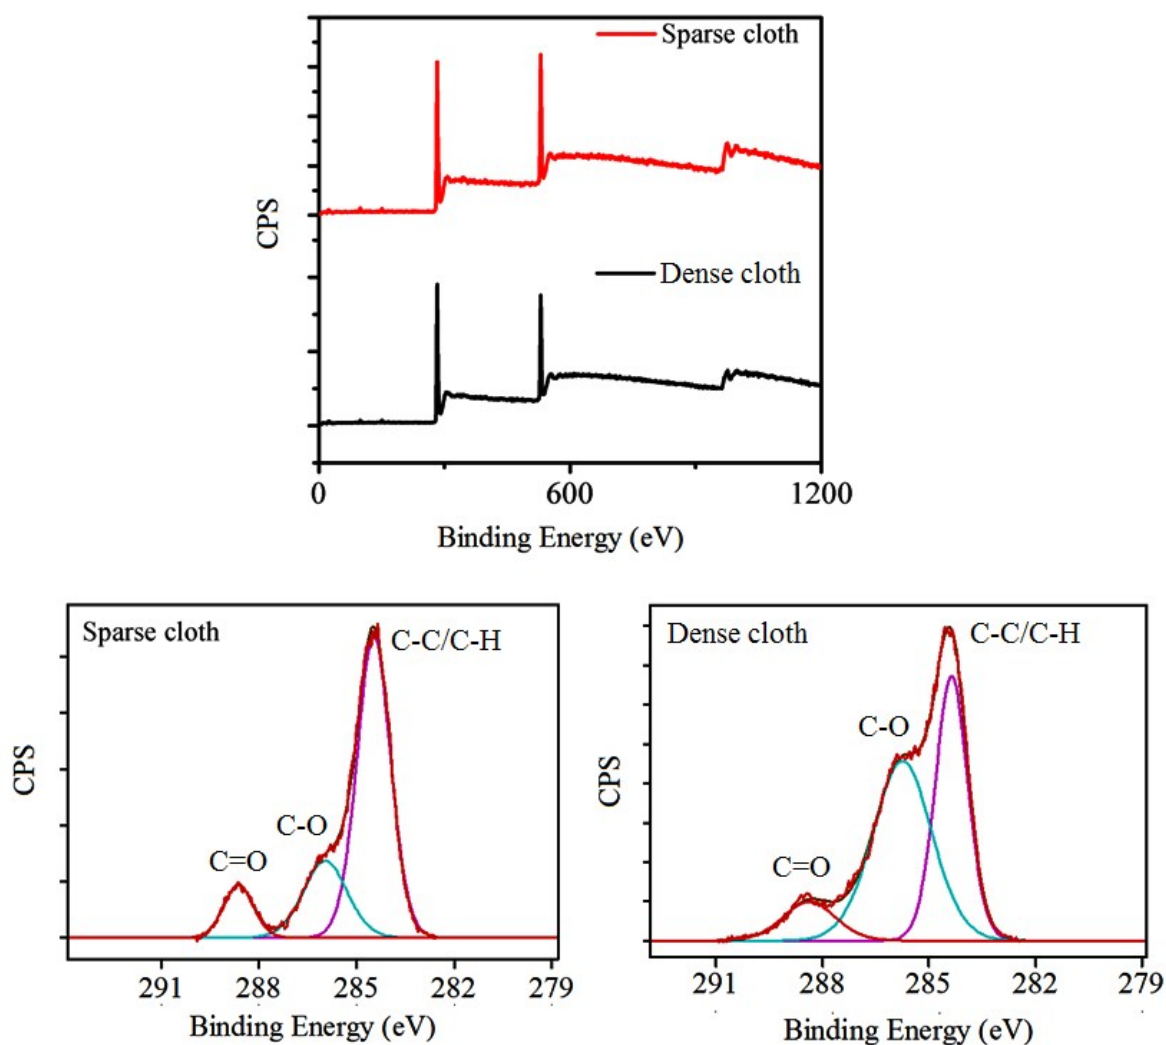

Figure S1 XPS of Uncoated cloth samples

Table-1 Atomic percentage of C and O in uncoated cloth samples

| Sample name            | C (%) | O (%) |
|------------------------|-------|-------|
| Dense cloth (Cloth-A)  | 80.86 | 19.14 |
| Sparse cloth (Cloth-B) | 78.93 | 21.07 |

## XRD analysis of the pristine cloth

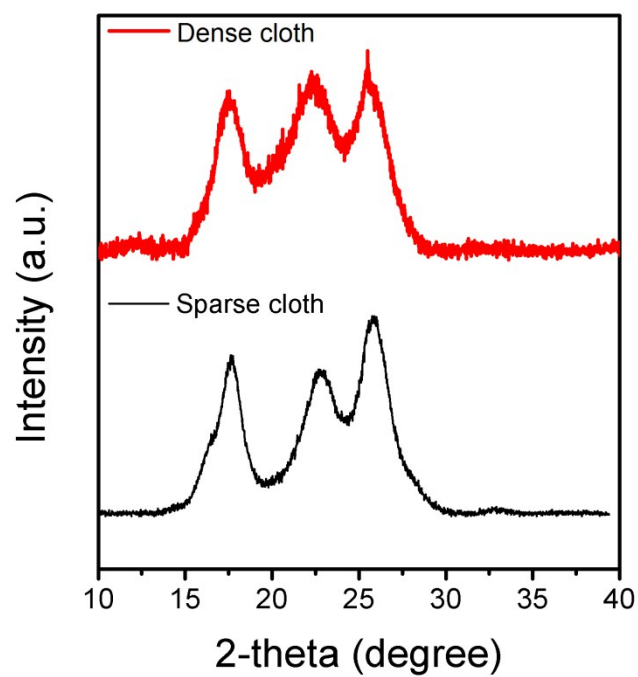

Figure S2 XRD of pristine cloth samples

XRD patterns of pristine clothes exhibit three common major peaks at 17.5, 22.6 and 25.8° suggesting that both cloth samples have same crystalline nature.
